# Supplementary material for: Peer Support Services in Behavioral Health Facilities: Secondary Analysis From Two National Surveys
Source: Atypon-hosted journal article supplement (doi:10.1176/appi.ps.20220366), 2023-05-31

### Figure S1

#### Top and Bottom Deciles for the Availability of Mental Health Peer Services in Each State

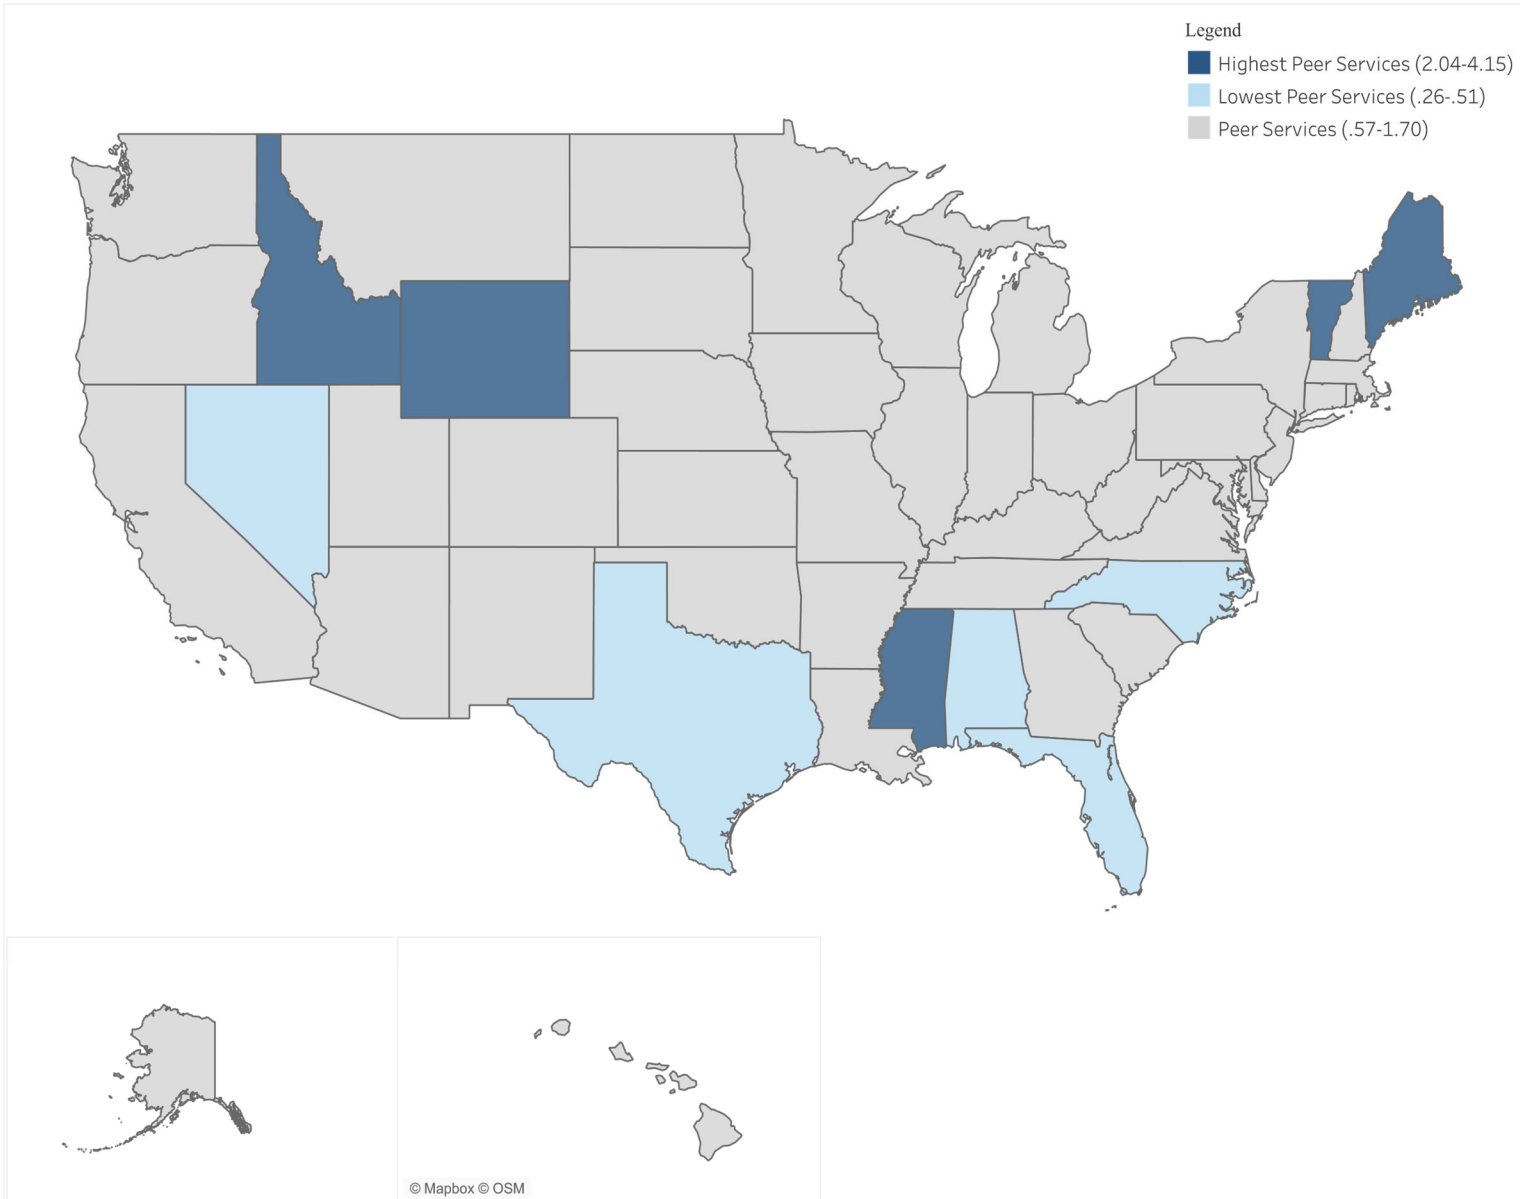

**Figure S2**

**Top and Bottom Deciles for the Availability of Substance Use Peer Services in Each State**

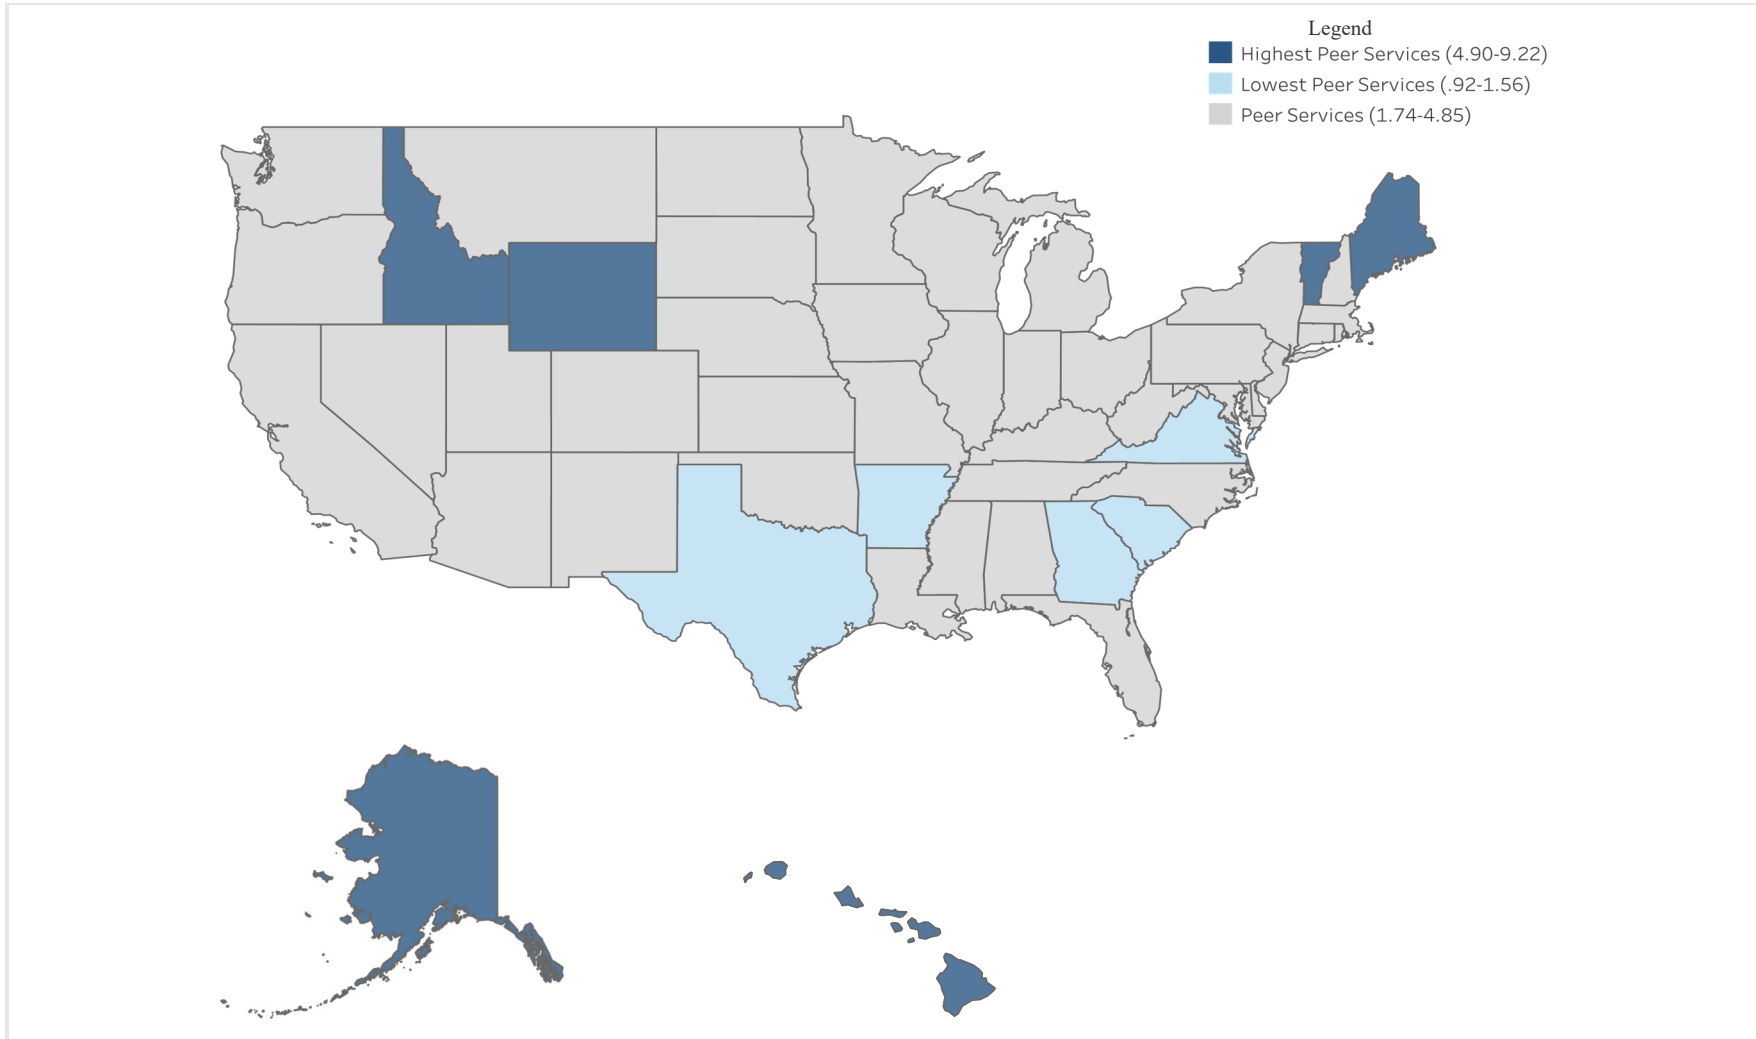

Supplement: appi.ps.20220366.ds001.pdf [file appi.ps.20220366.ds001.pdf]
